# Supplementary material for: Genetically Encoded Biosensors to Monitor Intracellular Reactive Oxygen and Nitrogen Species and Glutathione Redox Potential in Skeletal Muscle Cells
Source: MDPI journal article supplement (doi:10.3390/ijms221910876), 2021-10-08

# Supplementary - Figure 1(a)

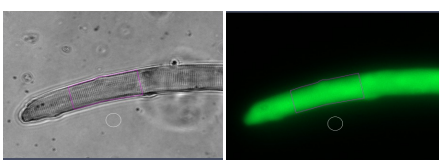

Fluorescence Emis.520 (Exc.488)

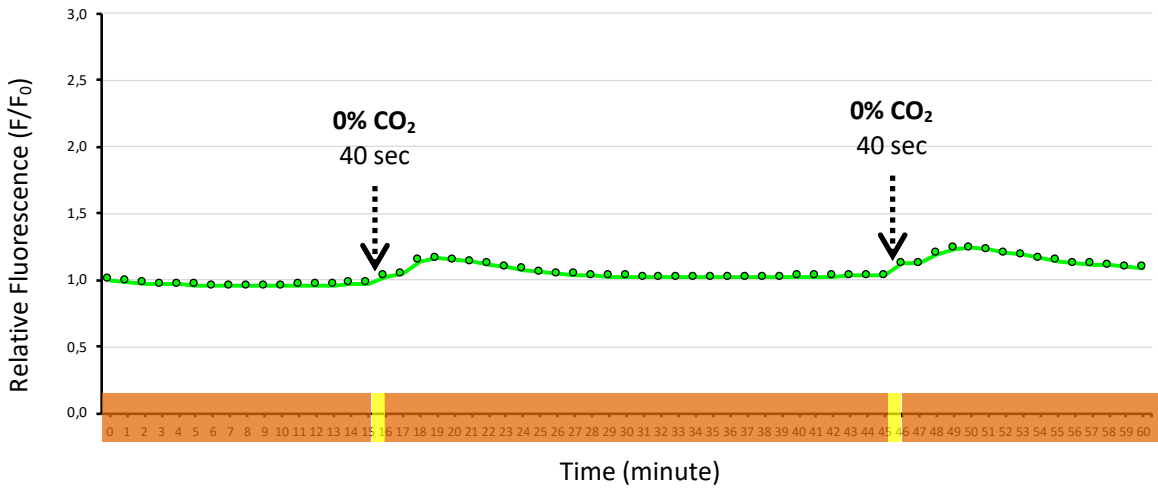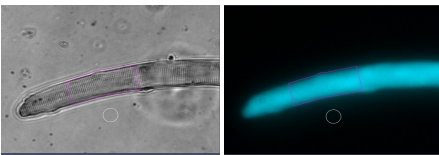

Fluorescence Emis.520 (Exc.420)

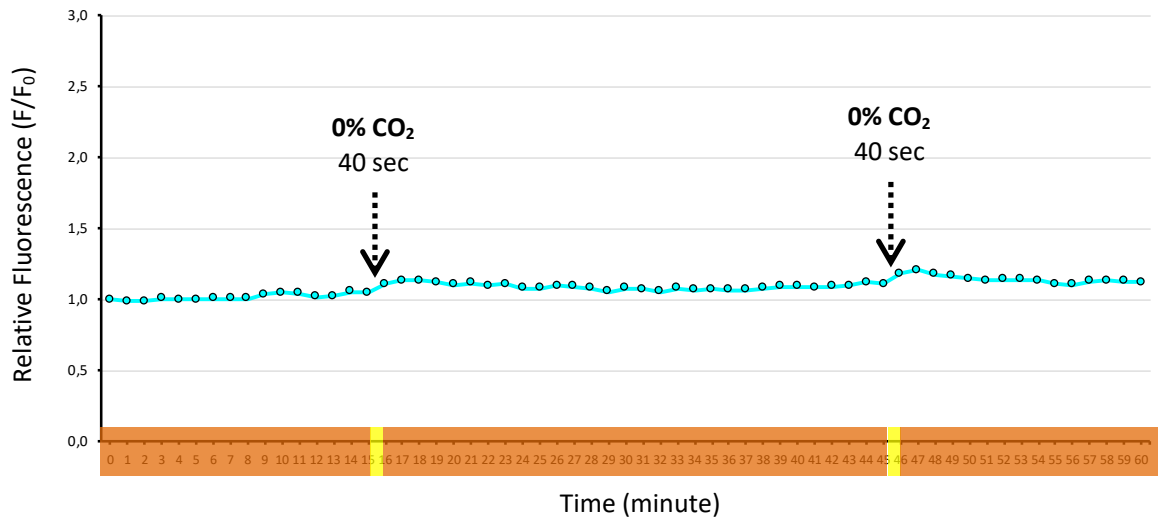

Fluorescence Emis.520 (Exc.488) / Fluorescence Emis.520 (Exc.420)

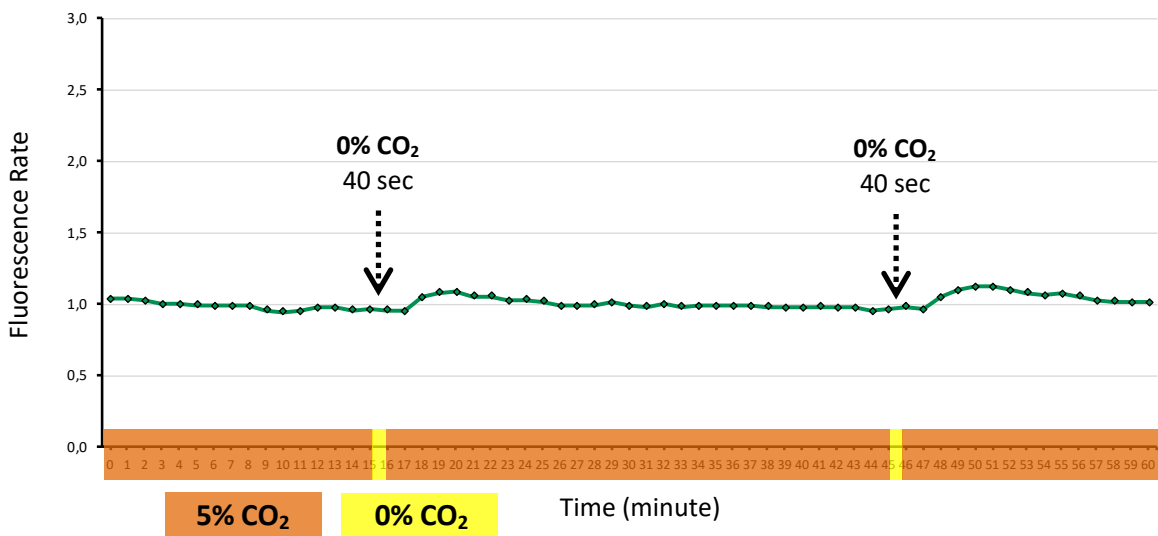

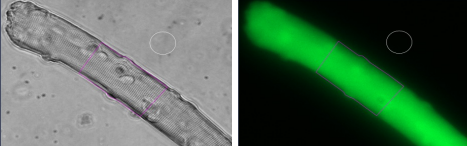

Fluorescence Emis.520 (Exc.488)

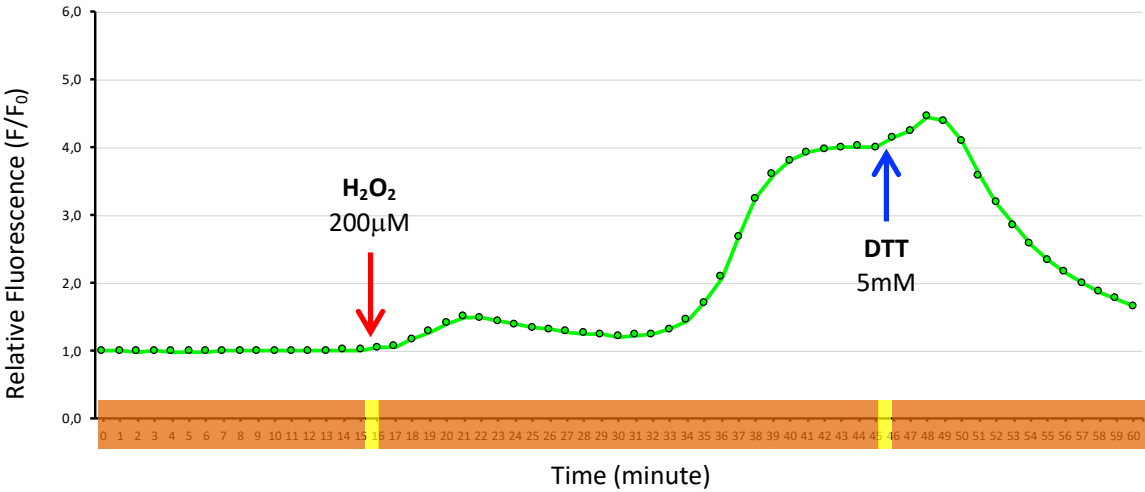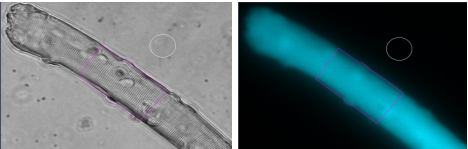

Fluorescence Emis.520 (Exc.420)

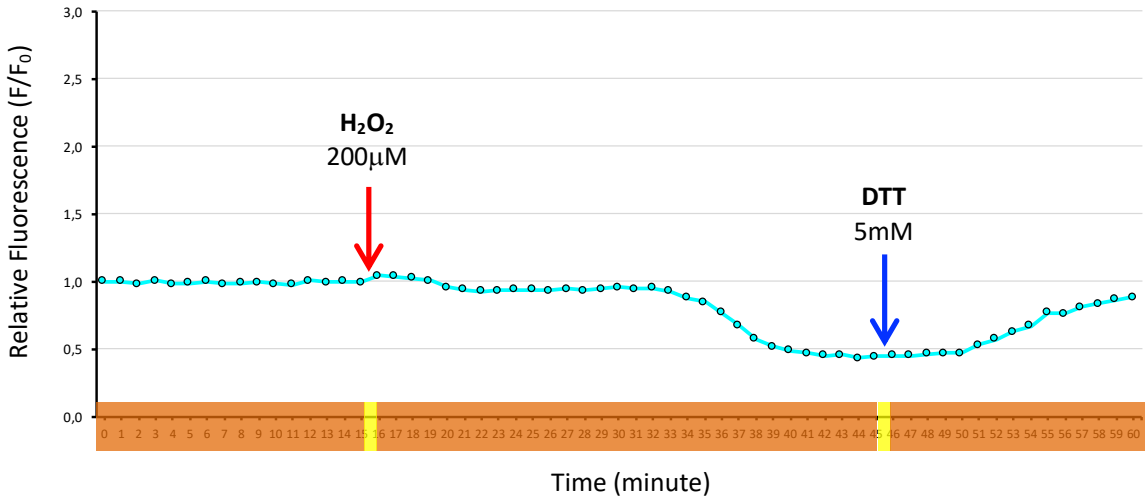

Fluorescence Emis.520 (Exc.488) / Fluorescence Emis.520 (Exc.420)

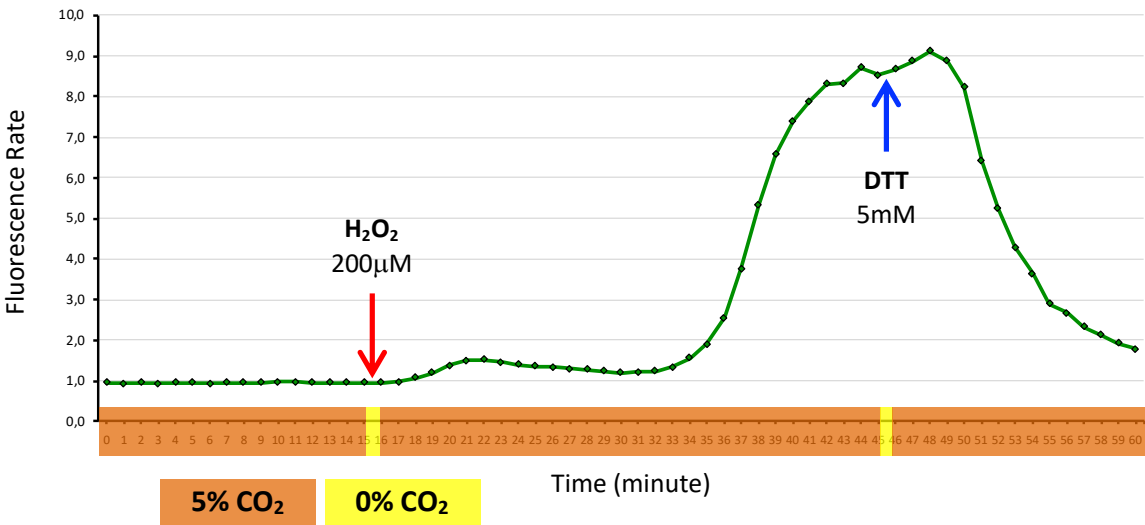

Fluorescence Emis.520 (Exc.488) / Fluorescence Emis.520 (Exc.420)

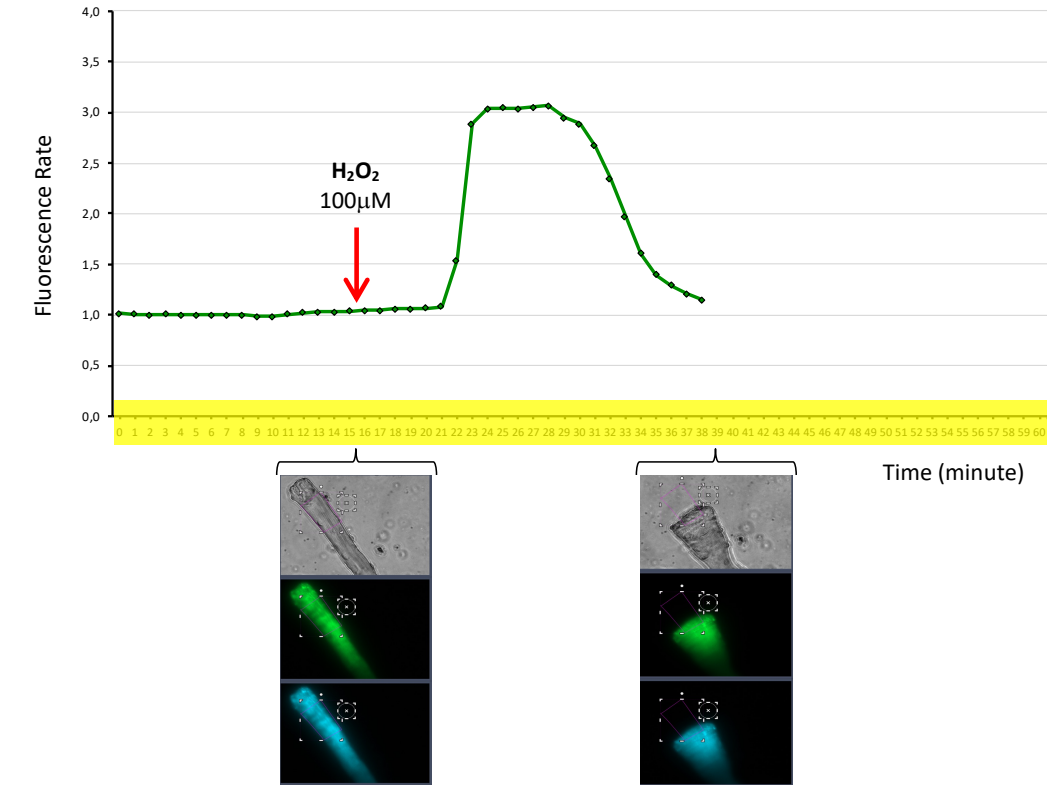

Fluorescence Emis.520 (Exc.488) / Fluorescence Emis.520 (Exc.420)

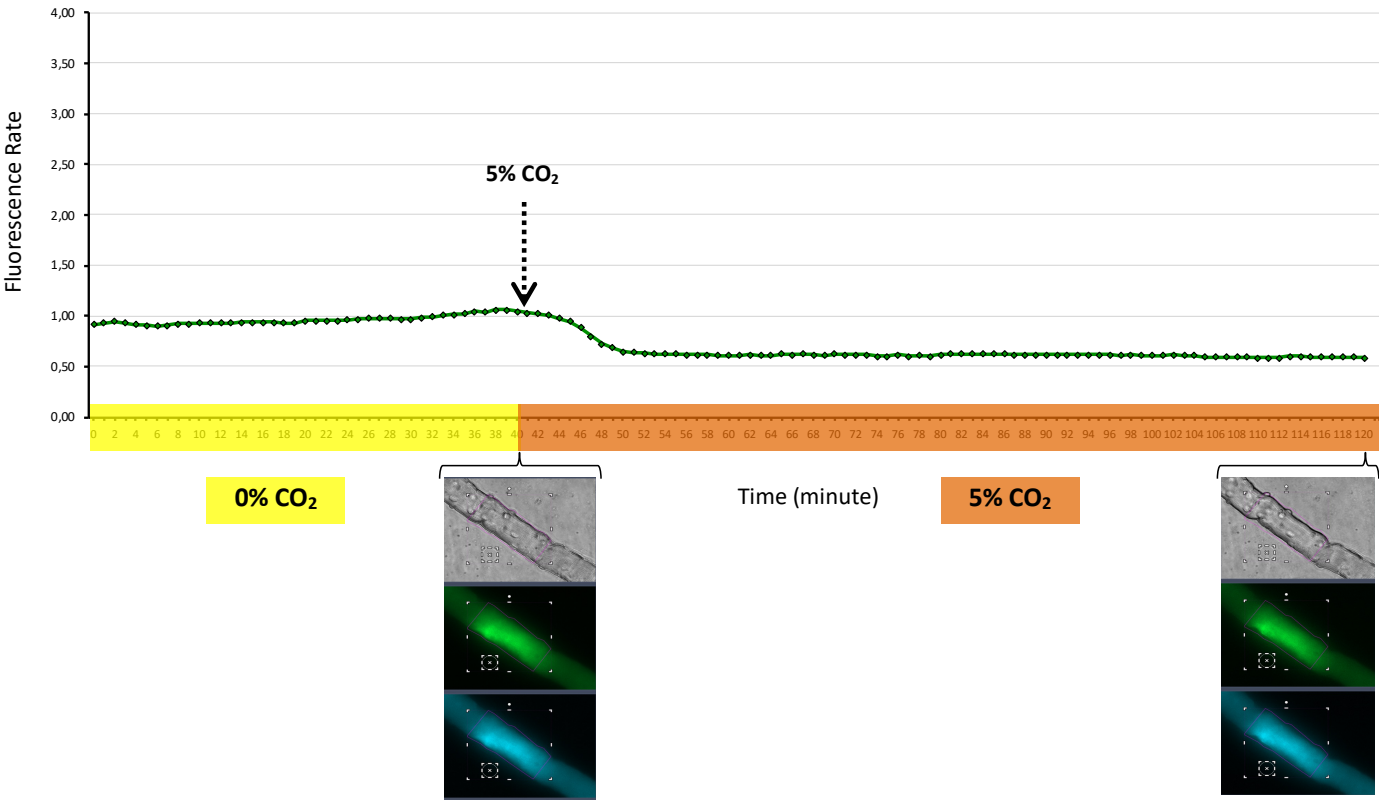

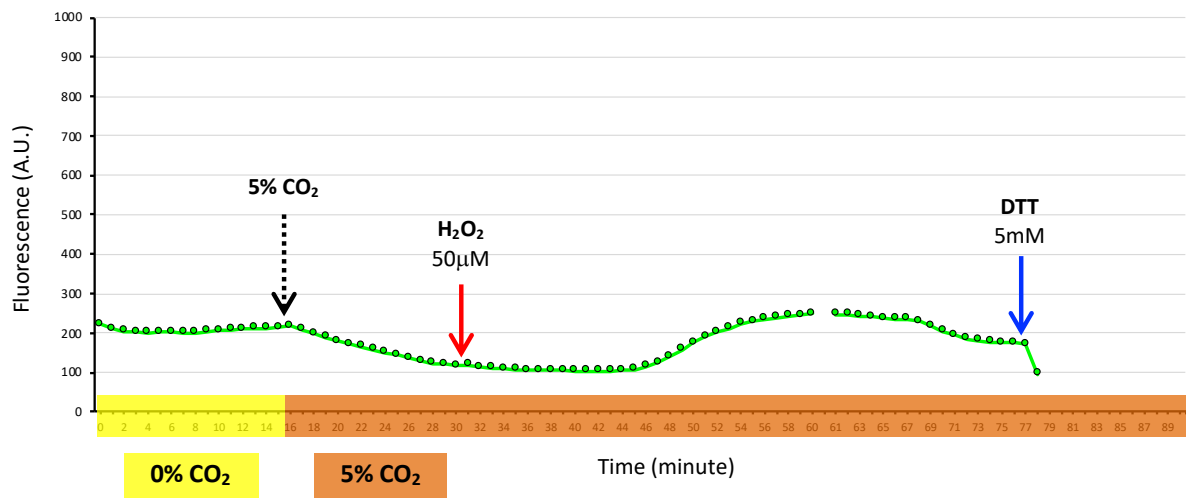

Fluorescence Emis.520 (Exc.420)

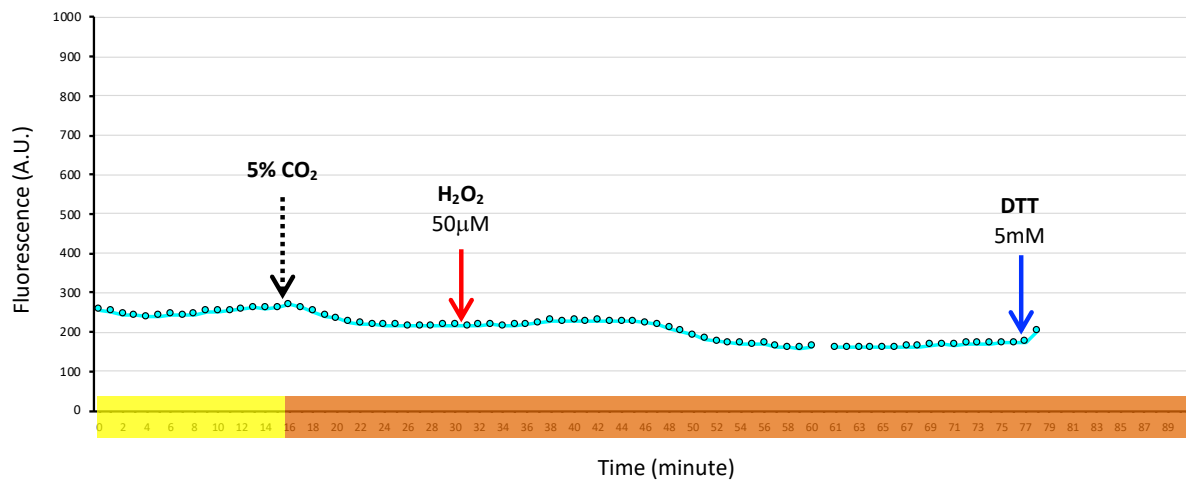

Fluorescence Emis.520 (Exc.488) / Fluorescence Emis.520 (Exc.420)

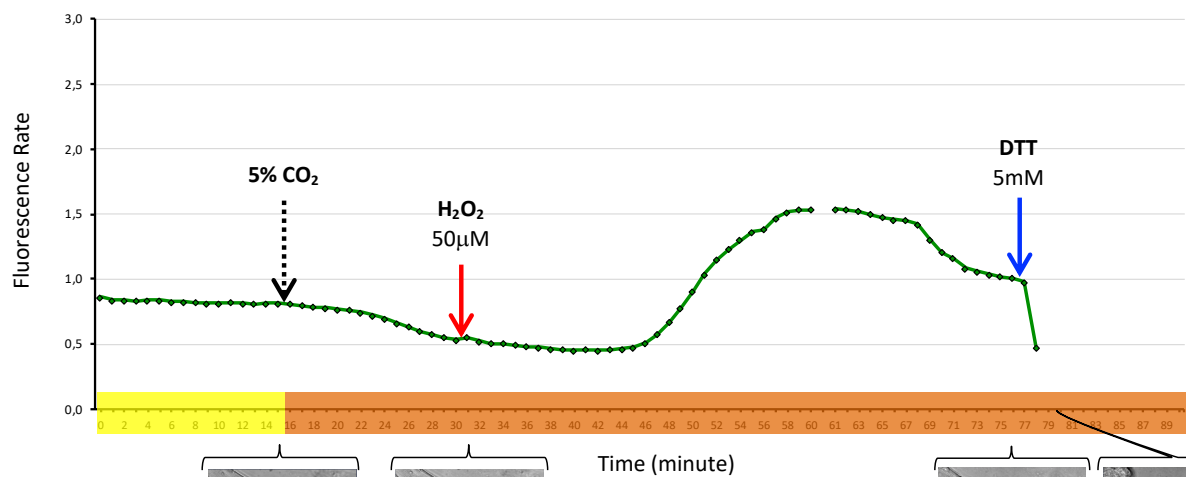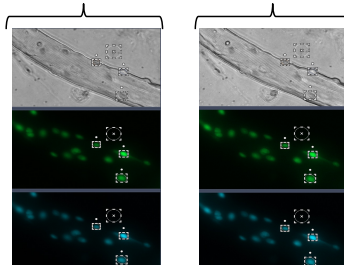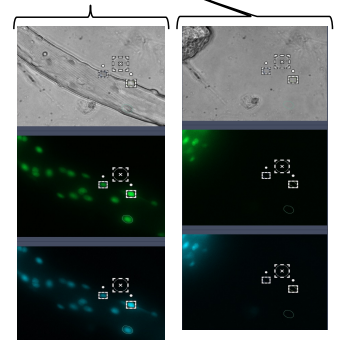



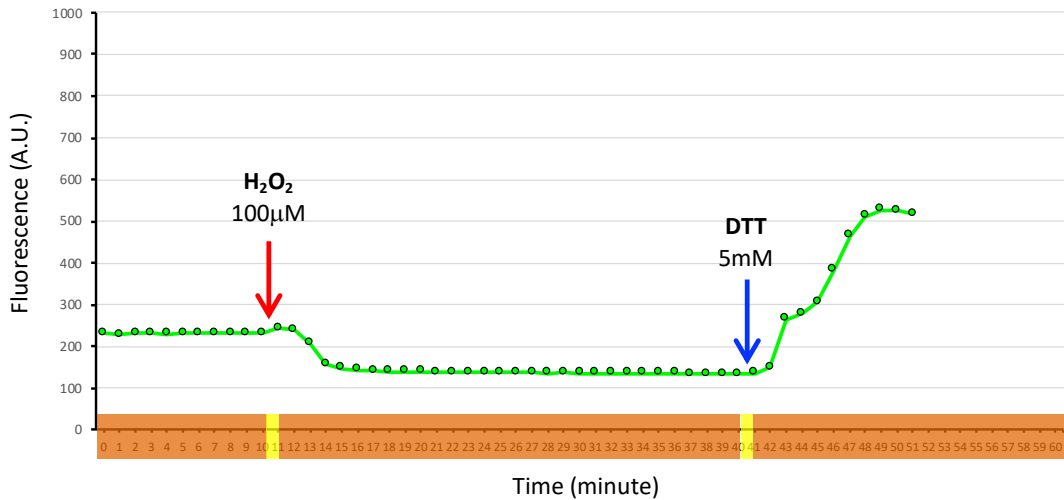

Fluorescence Emis.520 (Exc.420)

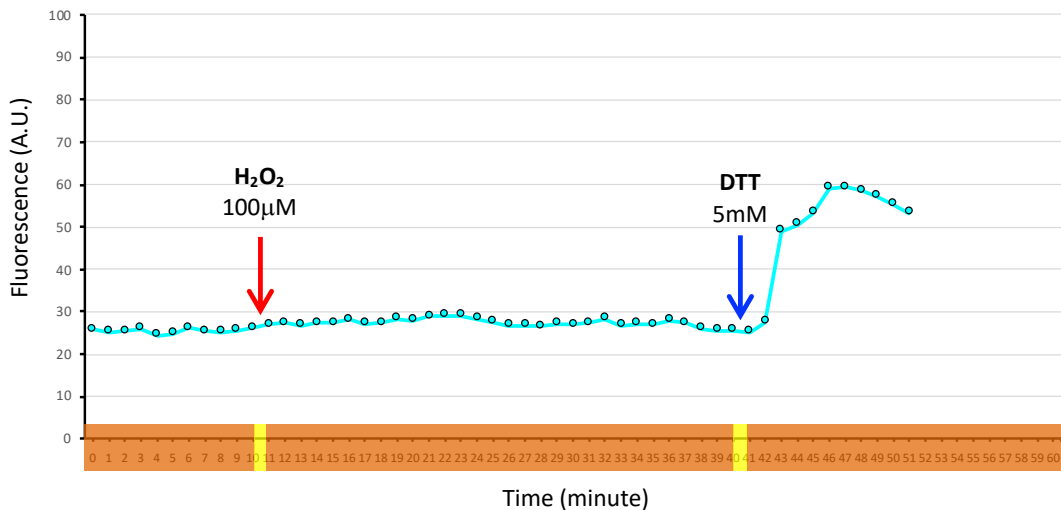

Fluorescence Emis.520 (Exc.420) / Fluorescence Emis.520 (Exc.488)

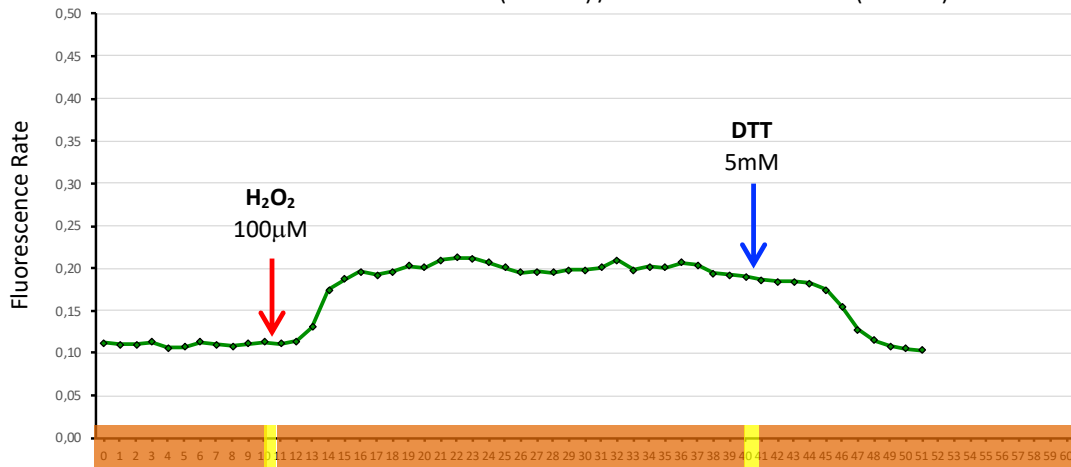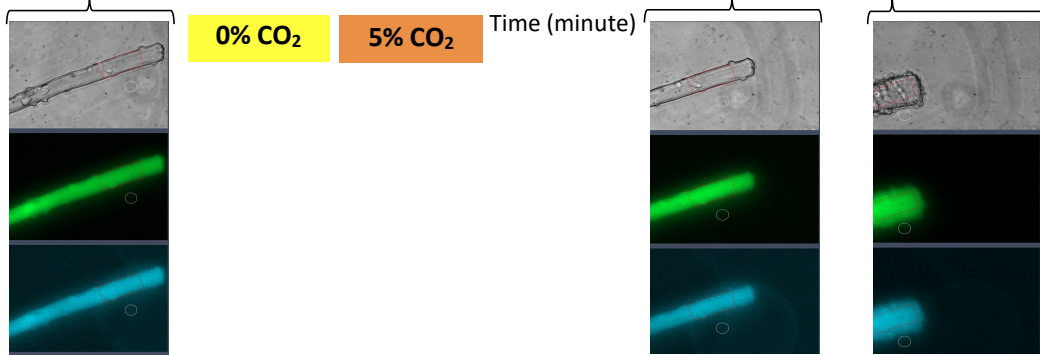

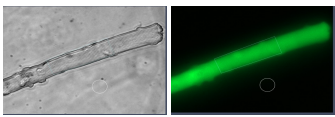

Fluorescence Emis.520 (Exc.488)

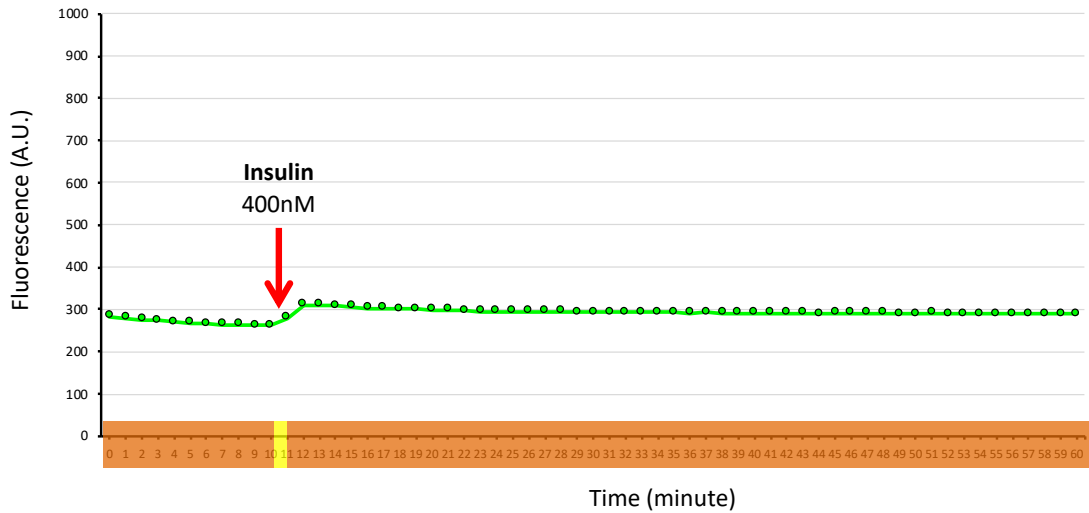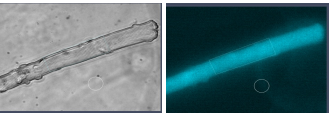

Fluorescence Emis.520 (Exc.420)

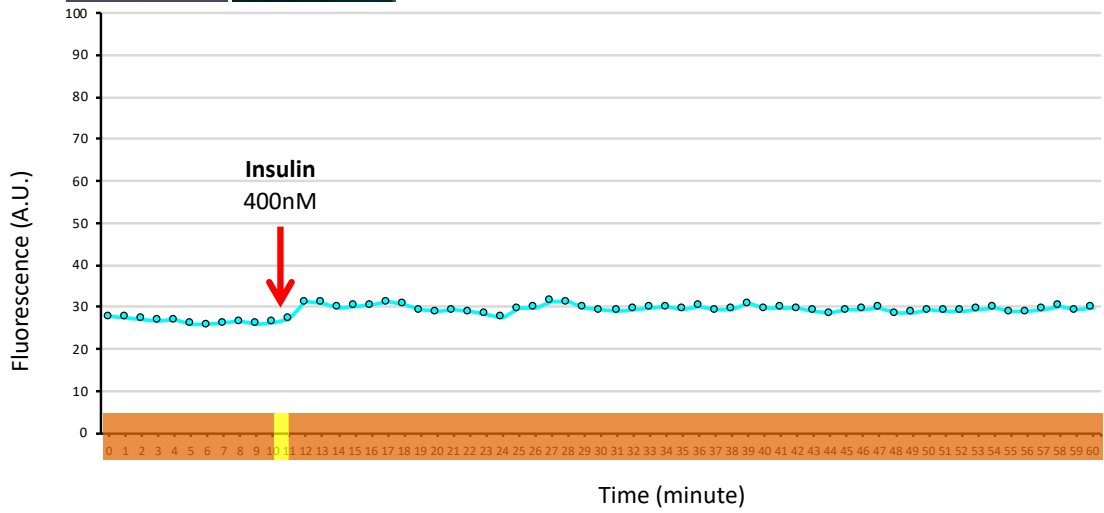

Fluorescence Emis.520 (Exc.420) / Fluorescence Emis.520 (Exc.488)

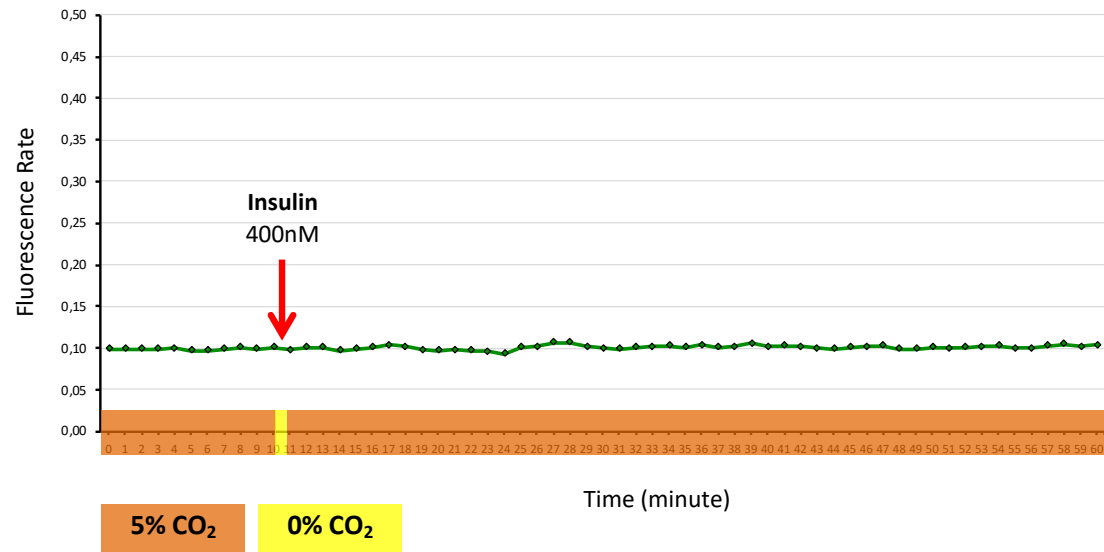

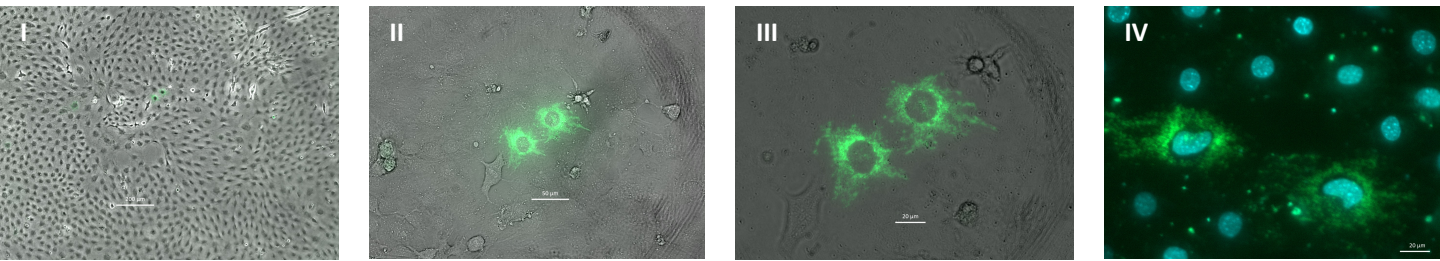

Fluorescence Emis.520 (Exc.488)

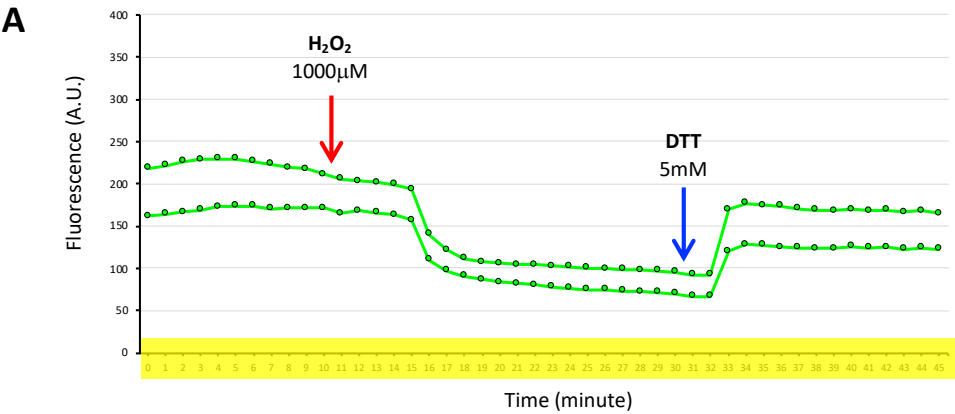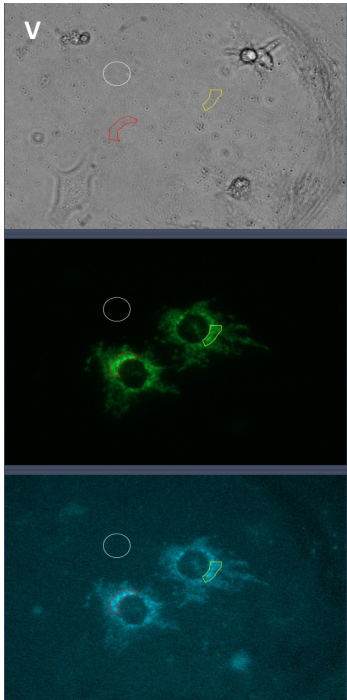

Fluorescence Emis.520 (Exc.420)

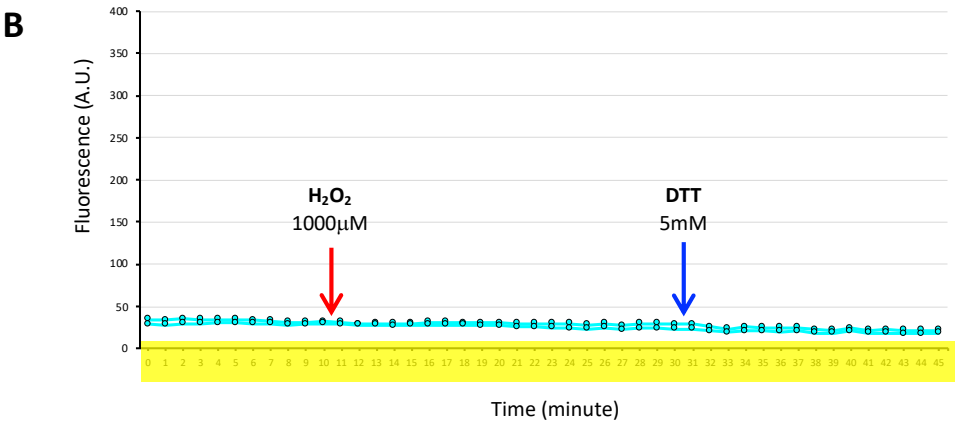

Fluorescence Emis.520 (Exc.420) / Fluorescence Emis.520 (Exc.488)

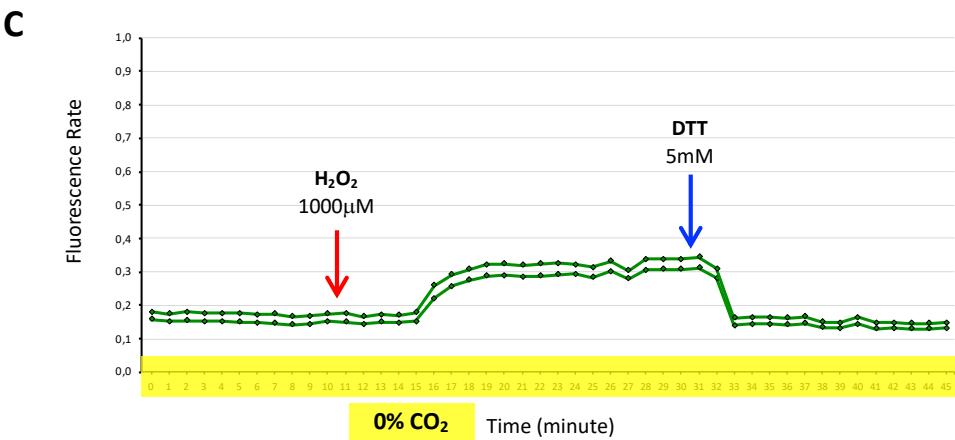

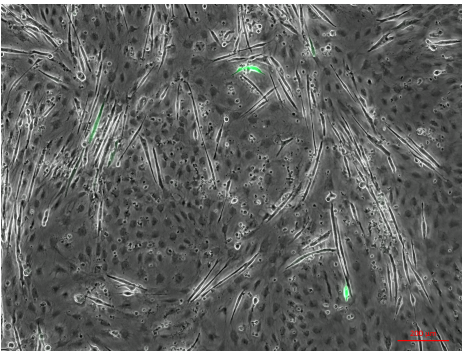

5x

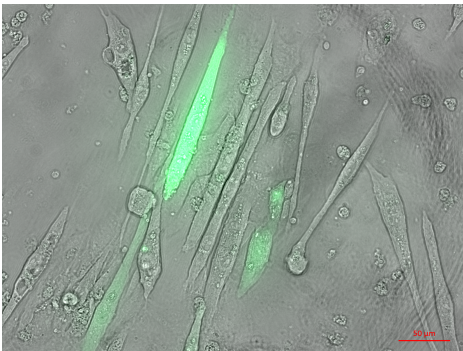

20x

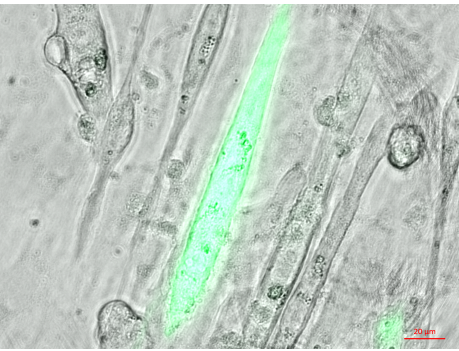

40x

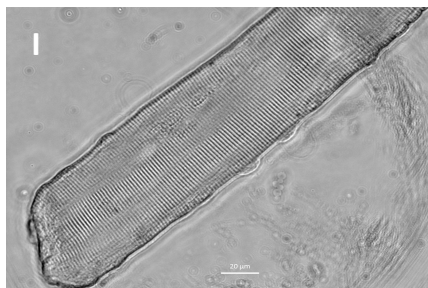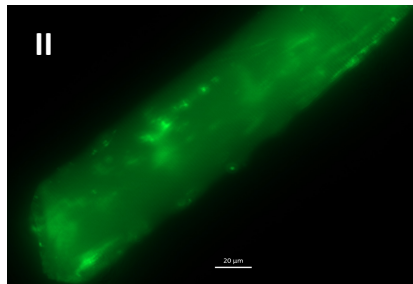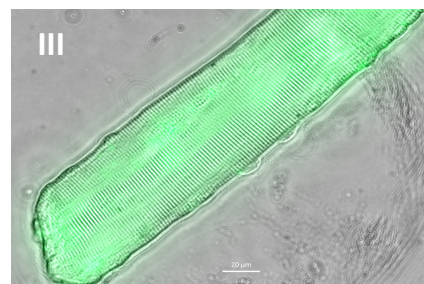

Fluorescence Emis.520 (Exc.488)

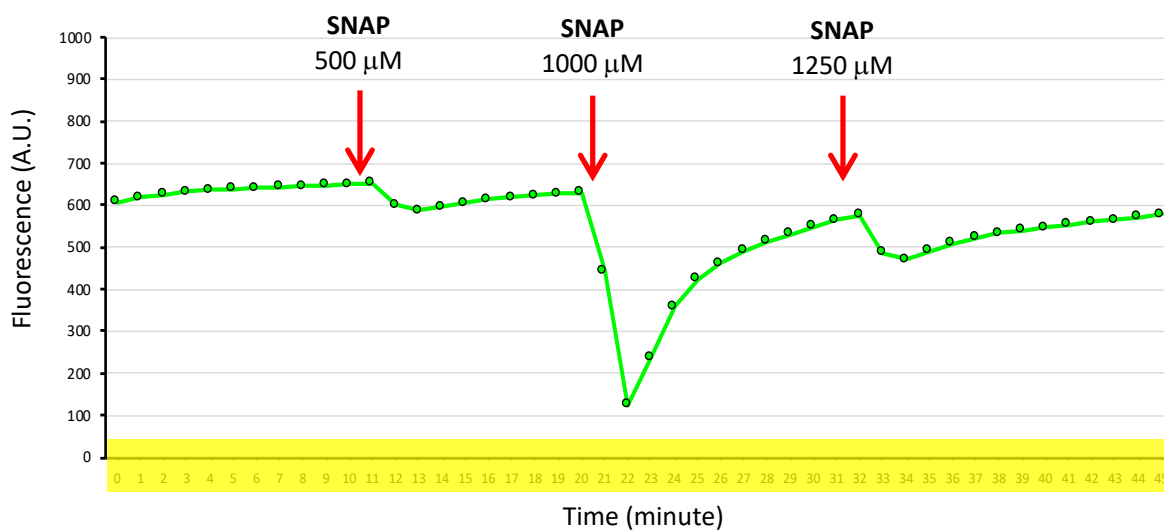

Fluorescence Emis.520 (Exc.488)

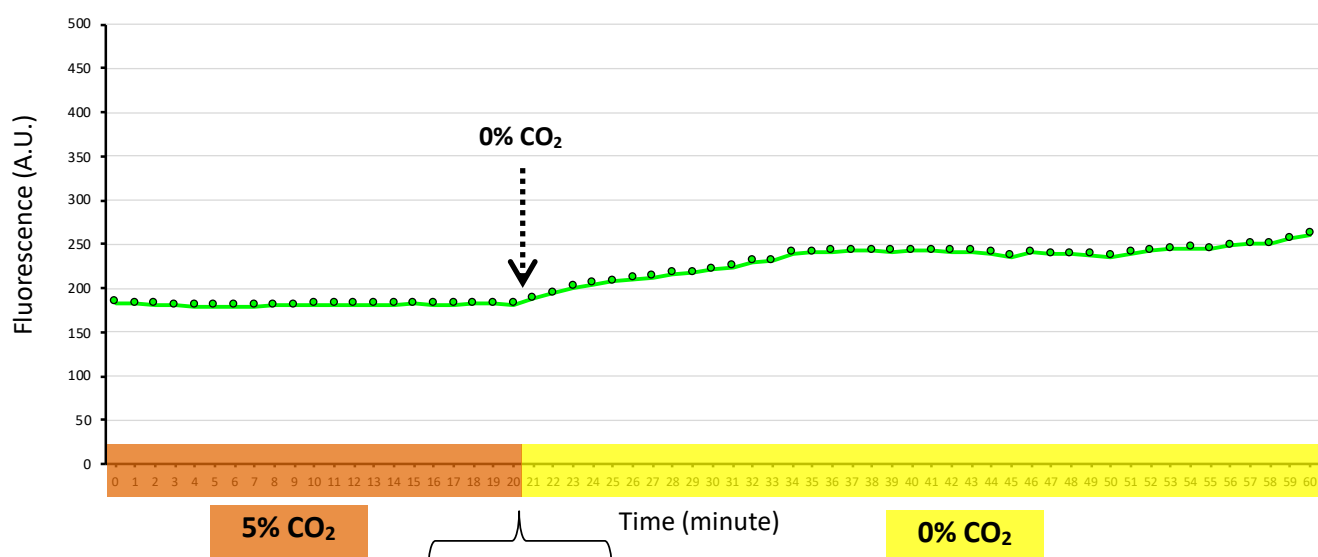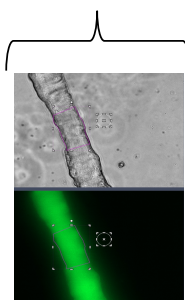



**pH assessment of cell culture medium exposed at different CO<sub>2</sub> environmental concentration. Correlation between fluctuations of CO<sub>2</sub> environmental concentration and changes of pH of cell culture medium.**

We constantly observed that sensitivity of biosensors to pH was present when experiments were undertaken. We realised the pH effect on fluorescence emitted by biosensors when we disrupted the CO<sub>2</sub> atmosphere from 0 to 5% CO<sub>2</sub> and from 5 to 0% CO<sub>2</sub>. When this CO<sub>2</sub> disruption occurred, it was rapidly reflected on the fluorescence emitted by biosensors, such as are shown in figures 1(a), 2(b), 3 and 4. A rapid disruption (40 seconds) of CO<sub>2</sub> atmosphere produced changes in biosensor fluorescence. In addition, to assess that CO<sub>2</sub> affects pH we undertook a test experiment based in a colorimetric pH indicator, Phenol Red, which is used broadly in culture medium as pH indicator. Thus, image below shows three plates with cell culture medium that were placed at different CO<sub>2</sub> atmosphere and temperature. Central plate was at 5% CO<sub>2</sub> atmosphere, and medium shows an orange - soft pink colour, which indicates a neutral pH (7,0-7,5). However, plates, right and left hand-side, were at CO<sub>2</sub> atmosphere around 0% CO<sub>2</sub> (room CO<sub>2</sub> atmosphere), and the colour of the medium was strong pink or violet, which indicated a basic pH (pH>8,0). These situations concerning pH can be extrapolated for the time course experiments that are presented on figures. Thus, when the disruption of CO<sub>2</sub> atmosphere occurred for 40 seconds or longer time, the fluorescence of biosensors changed. As it is stated in the discussion and supported by references, the fluorochromes of biosensors, YFP and GFP, are sensitive to pH. This drives to conclude, that the changes in biosensor fluorescence when CO<sub>2</sub> atmosphere was modified were evoked by pH fluctuations of cell culture medium.

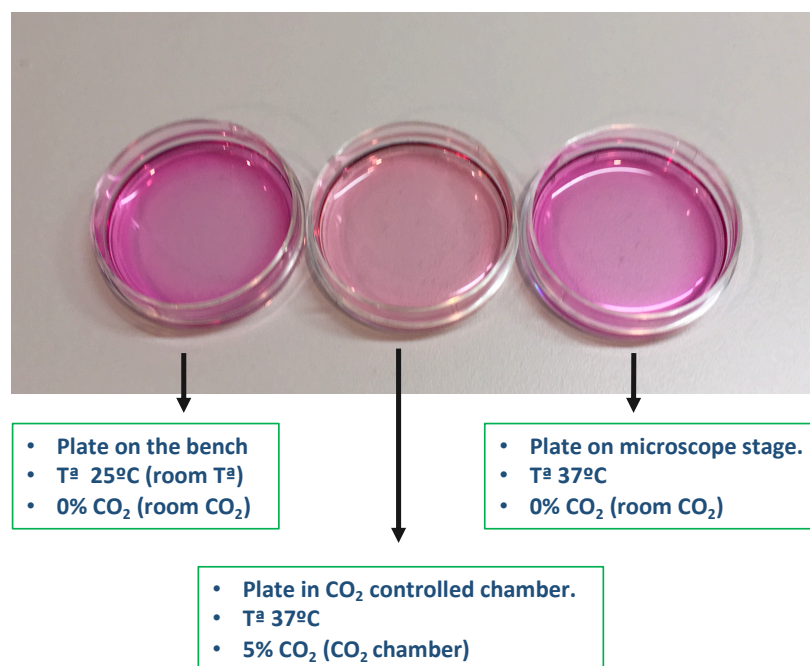

Supplement: s1 [file s1]
